# Supplementary material for: Homologous Recombination Mediates Functional Recovery of Dysferlin Deficiency following AAV5 Gene Transfer
Source: PubMed Central journal article supplement (PMC3376115; doi:10.1371/journal.pone.0039233), 2012-06-15
Supplement: pone.0039233.s001.pdf [file pone.0039233.s001.pdf]

# Figure S1

Reference Sequenced 60  
GGTGGAAAGATGAGCAGAAGCCCTGTTCTCGGAACGCCGGCTGACAAGCGGGGTGAGCG  
-----

Reference Sequenced 120  
CAGCCGGGGCGGGACCCAGCCTAGCCACTGGAGCAGCCGGGGTGGCCCGTTCCCCCTT  
-----

Reference Sequenced 180  
TAAGACAACTGCTCTAAGCCAGGAGCCAGAGATTCGAGCCGGCCTCGCCAGCCAGCCC  
-----

Reference Sequenced 240  
TCTCCAGCGAGGGGACCCACAAGCGCGCCTCGGCCCTCCCGACTTTCCGAGCCCTCTT  
-----

Reference Sequenced 300  
TGCCCTTGGGCGCACGGGCCCTACACGCGCCAAGCATGCTGAGGGTCTTCATCCTCTA  
-----ATGCTGAGGGTCTTCATCCTCTA  
\*\*\*\*\*  
23

Reference Sequenced 360  
TGCCGAGAAGCTCCACACACCCGACACCGACATCAGCGATGCCTACTGCTCCGCGGTGTT  
360  
TGCCGAGAAGCTCCACACACCCGACACCGACATCAGCGATGCCTACTGCTCCGCGGTGTT  
83  
\*\*\*\*\*

Reference Sequenced 420  
TGAGGGGTGAAGAAGAGAACCAAAGTCATCAAGAACAGCGTGAACCTGTATGGAATGA  
420  
TGAGGGGTGAAGAAGAGAACCAAAGTCATCAAGAACAGCGTGAACCTGTATGGAATGA  
143  
\*\*\*\*\*

Reference Sequenced 480  
GGGATTGTAATGGGACCTCAAGGGCATCCCCCTGGACCAGGGCTCTGAGCTTCATGTGGT  
480  
GGGATTGTAATGGGACCTCAAGGGCATCCCCCTGGACCAGGGCTCTGAGCTTCATGTGGT  
203  
\*\*\*\*\*

Reference Sequenced 540  
GGTCAAAGACCATGAGACGATGGGGAGGAACAGGTTCTGGGGGAAGCCAAGTCCCACT  
540  
GGTCAAAGACCATGAGACGATGGGGAGGAACAGGTTCTGGGGGAAGCCAAGTCCCACT  
263  
\*\*\*\*\*

Reference Sequenced 600  
CCGAGAGGTCCTCGCCACCCCTAGTCTGTCCGCGAGCTTCAATGCCCCCTGCTGGACAC  
600  
CCGAGAGGTCCTCGCCACCCCTAGTCTGTCCGCGAGCTTCAATGCCCCCTGCTGGACAC  
323  
\*\*\*\*\*

Reference Sequenced 660  
CAAGAAGCAGCCACAGGGCCTCGCTGGTCTGCAGGTGCTTACACACCGTGCCTGG  
660  
CAAGAAGCAGCCACAGGGCCTCGCTGGTCTGCAGGTGCTTACACACCGTGCCTGG  
383  
\*\*\*\*\*

Reference Sequenced 720  
AGCTGTGCCCTGTTCCCGCCCTACTCCTCTGGAGCCCTCCCGACTCTGCCTGACCT  
720  
AGCTGTGCCCTGTTCCCGCCCTACTCCTCTGGAGCCCTCCCGACTCTGCCTGACCT  
443  
\*\*\*\*\*

Reference Sequenced 780  
GGATGTAGTGGCAGACACAGGAGGAGAGAACACAGAGGACCAGGGACTCACTGGAGA  
780  
GGATGTAGTGGCAGACACAGGAGGAGAGAACACAGAGGACCAGGGACTCACTGGAGA  
503  
\*\*\*\*\*

Reference Sequenced 840  
TGAGCGGAGCCATTCTGGATCAAAGCGGAGGCCGGGGCTCCACCACCCCAAGGAA  
840  
TGAGCGGAGCCATTCTGGATCAAAGCGGAGGCCGGGGCTCCACCACCCCAAGGAA  
563  
\*\*\*\*\*

Reference Sequenced 900  
ACTACCTTACGTCTCCGCCCACTACCCCGGATCAAAGAAAGCGAAGTGCCTTAC  
900  
ACTACCTTACGTCTCCGCCCACTACCCCGGATCAAAGAAAGCGAAGTGCCTTAC  
623  
\*\*\*\*\*

Reference Sequenced 960  
ATCTAGAAAGCTGCTGTACAGCAAACCGCAGGATTTCCAGATCAGGGTCCAGGTGATCGA  
960  
ATCTAGAAAGCTGCTGTACAGCAAACCGCAGGATTTCCAGATCAGGGTCCAGGTGATCGA  
683  
\*\*\*\*\*

Reference Sequenced 1020  
GGGGCGCAGCTGCCGGGGTGAACATCAAGCCTGTGGTCAAGGTTACCGCTGCAGGGCA  
1020  
GGGGCGCAGCTGCCGGGGTGAACATCAAGCCTGTGGTCAAGGTTACCGCTGCAGGGCA  
743  
\*\*\*\*\*

Reference Sequenced 1080  
GACCAAGCGGACGCGGATCCACAAGGAAACAGCCCACTTCAATGAGACTCTTTCTT  
1080  
GACCAAGCGGACGCGGATCCACAAGGAAACAGCCCACTTCAATGAGACTCTTTCTT  
803  
\*\*\*\*\*

Reference Sequenced 1140  
CAACTGTTTGACTCTCCTGGGAGCTGTTTGTAGAGCCATCTTTATCAGGTGGTGA  
1140  
CAACTGTTTGACTCTCCTGGGAGCTGTTTGTAGAGCCATCTTTATCAGGTGGTGA  
863  
\*\*\*\*\*

Reference 1200  
CTCTCGTCTCTCAGGACAGATGCTCTCCTCGGGGAGTTCGGATGGACGTGGCCACCAT  
1200

Sequenced CTCTCGTTCTCTCAGGACAGATGCTCTCCTCGGGGAGTTCCGGATGGACGTGGGCACCAT 923  
\*\*\*\*\*

Reference TTACAGAGAGCCCCGGCAGCCTATCTCAGGAAGTGGCTGCTCTCAGACCTGATGA 1260  
Sequenced TTACAGAGAGCCCGGCAGCCTATCTCAGGAAGTGGCTGCTCTCAGACCTGATGA 983  
\*\*\*\*\*

Reference CTTCTCTGCTGGGGCCAGAGGCTACCTGAAAACAAGCCTTTGTGTCTGGGGCCTGGGA 1320  
Sequenced CTTCTCTGCTGGGGCCAGAGGCTACCTGAAAACAAGCCTTTGTGTCTGGGGCCTGGGA 1043  
\*\*\*\*\*

Reference CGAAGCGCCTCTGGAGAGAAAAGACCCCTCTGAAGACAAGGAGGACATTGAAAGCAACCT 1380  
Sequenced CGAAGCGCCTCTGGAGAGAAAAGACCCCTCTGAAGACAAGGAGGACATTGAAAGCAACCT 1103  
\*\*\*\*\*

Reference GCTCCGGCCACAGGCGTAGCCCTGCGAGGAGCCACTTCTGCTGAAGGTCTTCCGGGC 1440  
Sequenced GCTCCGGCCACAGGCGTAGCCCTGCGAGGAGCCACTTCTGCTGAAGGTCTTCCGGGC 1163  
\*\*\*\*\*

Reference CGAGGACTTGCCGAGATGGACGATGCCGTGATGGACAACGTGAAACAGATCTTTGGCTT 1500  
Sequenced CGAGGACTTGCCGAGATGGACGATGCCGTGATGGACAACGTGAAACAGATCTTTGGCTT 1223  
\*\*\*\*\*

Reference CGAGAGTAACAAGAAGAACTTGGTGGACCCCTTTGTGGAGGTCAGCTTTGCGGGGAAAAT 1560  
Sequenced CGAGAGTAACAAGAAGAACTTGGTGGACCCCTTTGTGGAGGTCAGCTTTGCGGGGAAAAT 1283  
\*\*\*\*\*

Reference GCTGTGCAGCAAGATCTTGAGAAGACGGCCAAACCCTCAGTGAACCAGAATCACACT 1620  
Sequenced GCTGTGCAGCAAGATCTTGAGAAGACGGCCAAACCCTCAGTGAACCAGAATCACACT 1343  
\*\*\*\*\*

Reference GCCTGCCATGTTTCCCTCCATGTGCGAAAAAATGAGGATTTCGTATCATAGACTGGGACCG 1680  
Sequenced GCCTGCCATGTTTCCCTCCATGTGCGAAAAAATGAGGATTTCGTATCATAGACTGGGACCG 1403  
\*\*\*\*\*

Reference CTTGACTCACAATGACATCGTGGCTACCACCTACCTGAGTATGTCGAAAATCTCTGCCC 1740  
Sequenced CTTGACTCACAATGACATCGTGGCTACCACCTACCTGAGTATGTCGAAAATCTCTGCCC 1463  
\*\*\*\*\*

Reference TGGAGGAGAAAATAGAAGAGGAGCCTGCAGGTGCTGTCAAGCCTTCGAAAGCCTCAGACTT 1800  
Sequenced TGGAGGAGAAAATAGAAGAGGAGCCTGCAGGTGCTGTCAAGCCTTCGAAAGCCTCAGACTT 1523  
\*\*\*\*\*

Reference GGATGACTACCTGGGCTTCTCCCACTTTTGGGCCCTGCTACATCAACTCTATGGCAG 1860  
Sequenced GGATGACTACCTGGGCTTCTCCCACTTTTGGGCCCTGCTACATCAACTCTATGGCAG 1583  
\*\*\*\*\*

Reference TCCCAGAGAGTTACAGGCTTCCCAGACCCCTACACAGAGCTCAACACAGGCAAGGGGGA 1920  
Sequenced TCCCAGAGAGTTACAGGCTTCCCAGACCCCTACACAGAGCTCAACACAGGCAAGGGGGA 1643  
\*\*\*\*\*

Reference AGGTGTGGCTTATCGTGGCCGGCTTCTGCTCTCCCTGGAGACCAAGCTGGTGGAGCACAG 1980  
Sequenced AGGTGTGGCTTATCGTGGCCGGCTTCTGCTCTCCCTGGAGACCAAGCTGGTGGAGCACAG 1703  
\*\*\*\*\*

Reference TGAACAGAAGGTGGAGACCTTCTGCGGATGACATCCTCCGGGTGGAGAAGTACCTTAG 2040  
Sequenced TGAACAGAAGGTGGAGACCTTCTGCGGATGACATCCTCCGGGTGGAGAAGTACCTTAG 1763  
\*\*\*\*\*

Reference GAGGCGCAAGTACTCCCTGTTTGGCGCCTTCTACTCAGCCACCATGCTGCAGGATGTGA 2100  
Sequenced GAGGCGCAAGTACTCCCTGTTTGGCGCCTTCTACTCAGCCACCATGCTGCAGGATGTGA 1823  
\*\*\*\*\*

Reference TGATGCCATCCAGTTTGGAGTCAAGTACCGGAACTACGGGAACAAGTTTCGACATGACCTG 2160  
Sequenced TGATGCCATCCAGTTTGGAGTCAAGTACCGGAACTACGGGAACAAGTTTCGACATGACCTG 1883  
\*\*\*\*\*

Reference CTTGCGCTGGCCTCCACCACTCAGTACAGCCTGTCAGTCTTTGACGGGTGCCACTACTA 2220  
Sequenced CTTGCGCTGGCCTCCACCACTCAGTACAGCCTGTCAGTCTTTGACGGGTGCCACTACTA 1943  
\*\*\*\*\*

Reference CTACCTACCCTGGGGTAACGTGAAACCTGTGGTGGTGTGTATCTACTGGGAGGACAT 2280  
Sequenced CTACCTACCCTGGGGTAACGTGAAACCTGTGGTGGTGTGTATCTACTGGGAGGACAT 2003  
\*\*\*\*\*

Reference CAGCCATAGAATCGAGACTCAGAACCAGCTGCTTGGGATTGCTGACCGGTGGAAGCTGG 2340  
Sequenced CAGCCATAGAATCGAGACTCAGAACCAGCTGCTTGGGATTGCTGACCGGTGGAAGCTGG 2063  
\*\*\*\*\*

Reference CCTGGAGCAGGTCCACCTGGCCCTGAAGGCGCAGTGTCTCCACGGAGGACGTGGACTCGCT 2400  
Sequenced CCTGGAGCAGGTCCACCTGGCCCTGAAGGCGCAGTGTCTCCACGGAGGACGTGGACTCGCT 2123

```

*****
Reference      GGTTGGCTCAGCTGACGGATGAGCTCATCGCAGGCTGCAGCCAGCCTCTGGGTGACATCCA 2460
Sequenced     GGTTGGCTCAGCTGACGGATGAGCTCATCGCAGGCTGCAGCCAGCCTCTGGGTGACATCCA 2183
*****

Reference      TGAGACACCTCTGCCACCCACCTGGACCAGTACCTGTACCAGCTGCGCACCCATCACCT 2520
Sequenced     TGAGACACCTCTGCCACCCACCTGGACCAGTACCTGTACCAGCTGCGCACCCATCACCT 2243
*****

Reference      GAGCCAAATCACTGAGGCTGCCCTGGCCCTGAAGCTCGGCCACAGTGAGCTCCCTGCAGC 2580
Sequenced     GAGCCAAATCACTGAGGCTGCCCTGGCCCTGAAGCTCGGCCACAGTGAGCTCCCTGCAGC 2303
*****

Reference      TCTGGAGCAGGCGGAGGACTGGCTCCTGCGTCTGCGTGCCCTGGCAGAGGAGCCCAGAA 2640
Sequenced     TCTGGAGCAGGCGGAGGACTGGCTCCTGCGTCTGCGTGCCCTGGCAGAGGAGCCCAGAA 2363
*****

Reference      CAGCTGCCGGACATCGTCATCTGGATGTGACGGGAGACAAGCGTGTGGCATAACCAGCG 2700
Sequenced     CAGCTGCCGGACATCGTCATCTGGATGTGACGGGAGACAAGCGTGTGGCATAACCAGCG 2423
*****

Reference      GGTGCCCGCCACCAAGTCTTCTCTCCCGCGGGGTGCCAACTACTGTGGCAAGAATTG 2760
Sequenced     GGTGCCCGCCACCAAGTCTTCTCTCCCGCGGGGTGCCAACTACTGTGGCAAGAATTG 2483
*****

Reference      TGGGAAGCTACAGACAATCTTTCTGAAATATCCGATGGAGAAGGTGCCTGGCGCCCGAT 2820
Sequenced     TGGGAAGCTACAGACAATCTTTCTGAAATATCCGATGGAGAAGGTGCCTGGCGCCCGAT 2543
*****

Reference      GCCAGTGCAGATACGGGTCAAGCTGTGGTTTGGGCTCTCTGTGGATGAGAAGGAGTTCAA 2880
Sequenced     GCCAGTGCAGATACGGGTCAAGCTGTGGTTTGGGCTCTCTGTGGATGAGAAGGAGTTCAA 2603
*****

Reference      CCAGTTGTGAGGGGAAGCTGTCTGTCTTTGCTGAAACCTATGAGAACGAGACTAAGTT 2940
Sequenced     CCAGTTGTGAGGGGAAGCTGTCTGTCTTTGCTGAAACCTATGAGAACGAGACTAAGTT 2663
*****

Reference      GGCCCTTGTGTGGGAAGTGGGGCACAACGGGCCTCACCTACCCCAAGTTTCTGACGTAC 3000
Sequenced     GGCCCTTGTGTGGGAAGTGGGGCACAACGGGCCTCACCTACCCCAAGTTTCTGACGTAC 2723
*****

Reference      GGGCAAGATCAAGCTACCCAAGGACAGCTTCCGCCCTCGCCGGCTGGACCTGGGCTGG 3060
Sequenced     GGGCAAGATCAAGCTACCCAAGGACAGCTTCCGCCCTCGCCGGCTGGACCTGGGCTGG 2783
*****

Reference      AGATTGGTTCTGTGTGTCGGGAGAACTCTGCTCCATGACATGGACGCCGGTACCTGAG 3120
Sequenced     AGATTGGTTCTGTGTGTCGGGAGAACTCTGCTCCATGACATGGACGCCGGTACCTGAG 2843
*****

Reference      CTTCGTGGAAGAGGTGTTTGAGAACCAGACCCGGCTTCCCGGAGGCGAGTGGATCTACAT 3180
Sequenced     CTTCGTGGAAGAGGTGTTTGAGAACCAGACCCGGCTTCCCGGAGGCGAGTGGATCTACAT 2903
*****

Reference      GAGTGACAACCTACCCGATGTGAACGGGAGAAAGGTGCTTCCAAGGATGACATTGAGTG 3240
Sequenced     GAGTGACAACCTACCCGATGTGAACGGGAGAAAGGTGCTTCCAAGGATGACATTGAGTG 2963
*****

Reference      CCCACTGGGCTGGAAGTGGGAAGATGAGGAATGGTCCACAGACCTCAACCGGGCTGTGCA 3300
Sequenced     CCCACTGGGCTGGAAGTGGGAAGATGAGGAATGGTCCACAGACCTCAACCGGGCTGTGCA 3023
*****

Reference      TGAGCAAGGCTGGGAGTATAGCATCACCATCCCCCGAGCGGAAGCAGCACTGGGT 3360
Sequenced     TGAGCAAGGCTGGGAGTATAGCATCACCATCCCCCGAGCGGAAGCAGCACTGGGT 3083
*****

Reference      CCCTGTGAGAAGATGTACTACACACACCGACGGCGCGCTGGGTGCGCCTGCGCAGGAG 3420
Sequenced     CCCTGTGAGAAGATGTACTACACACACCGACGGCGCGCTGGGTGCGCCTGCGCAGGAG 3143
*****

Reference      GGATCTCAGCCAATGGAAGCACTGAAAAGGCACAGGCAGGCGGAGGCGGAGGGCGAGGG 3480
Sequenced     GGATCTCAGCCAATGGAAGCACTGAAAAGGCACAGGCAGGCGGAGGCGGAGGGCGAGGG 3203
*****

Reference      CTGGGAGTACGCCTCTCTTTTGGCTGGAAGTTCCACCTCGAGTACCGCAAGCAGATGC 3540
Sequenced     CTGGGAGTACGCCTCTCTTTTGGCTGGAAGTTCCACCTCGAGTACCGCAAGCAGATGC 3263
*****

Reference      CTTCGCCCGCCCGCTGGCGCCGTCGCATGGAGCCACTGGAGAAGACGGGCCTGCAGC 3600
Sequenced     CTTCGCCCGCCCGCTGGCGCCGTCGCATGGAGCCACTGGAGAAGACGGGCCTGCAGC 3323
*****

```

|           |                                                              |      |
|-----------|--------------------------------------------------------------|------|
| Reference | TGTGTTTGCCCTTGAGGGGCGCTGGGCGCGTGATGGATGACAAGAGTGAAGATTCCAT   | 3660 |
| Sequenced | TGTGTTTGCCCTTGAGGGGCGCTGGGCGCGTGATGGATGACAAGAGTGAAGATTCCAT   | 3383 |
|           | *****                                                        |      |
| Reference | GTCCGCTCCACCTTGAGCTTCGGTGTGAACAGACCCACGATTCCTGCATATTCGACTA   | 3720 |
| Sequenced | GTCCGCTCCACCTTGAGCTTCGGTGTGAACAGACCCACGATTCCTGCATATTCGACTA   | 3443 |
|           | *****                                                        |      |
| Reference | TGGGAACCGCTACCATCTACGCTGTACATGTACCAGGCCCGGACCTGGCTGCGATGGA   | 3780 |
| Sequenced | TGGGAACCGCTACCATCTACGCTGTACATGTACCAGGCCCGGACCTGGCTGCGATGGA   | 3503 |
|           | *****                                                        |      |
| Reference | CAAGGACTCTTTTCTGATCCCTATGCCATCGTCTCCTTCCTGCACCAGAGCCAGAAGAC  | 3840 |
| Sequenced | CAAGGACTCTTTTCTGATCCCTATGCCATCGTCTCCTTCCTGCACCAGAGCCAGAAGAC  | 3563 |
|           | *****                                                        |      |
| Reference | GGTGGTGGTGAAGAACACCCTTAACCCACCTGGGACCAGACGCTCATCTTCTACGAGAT  | 3900 |
| Sequenced | GGTGGTGGTGAAGAACACCCTTAACCCACCTGGGACCAGACGCTCATCTTCTACGAGAT  | 3623 |
|           | *****                                                        |      |
| Reference | CGAGATCTTTGGCGAGCCGCCACAGTTGCTGAGCAACCGCCAGCATTGTGGTGGAGCT   | 3960 |
| Sequenced | CGAGATCTTTGGCGAGCCGCCACAGTTGCTGAGCAACCGCCAGCATTGTGGTGGAGCT   | 3683 |
|           | *****                                                        |      |
| Reference | GTACGACCATGACACTTATGGTGCAGACGAGTTTATGGGTCGCTGCATCTGTCAACCGAG | 4020 |
| Sequenced | GTACGACCATGACACTTATGGTGCAGACGAGTTTATGGGTCGCTGCATCTGTCAACCGAG | 3743 |
|           | *****                                                        |      |
| Reference | TCTGGAACCGATGCCACGGCTGGCCTGGTTCCTGACGAGGGGCAGCCAGCCGTCGGG    | 4080 |
| Sequenced | TCTGGAACCGATGCCACGGCTGGCCTGGTTCCTGACGAGGGGCAGCCAGCCGTCGGG    | 3803 |
|           | *****                                                        |      |
| Reference | GGAGCTGCTGGCCTCTTTTGAGCTCATCCAGAGAGAGAAGCCGGCCATCCACCATATTCC | 4140 |
| Sequenced | GGAGCTGCTGGCCTCTTTTGAGCTCATCCAGAGAGAGAAGCCGGCCATCCACCATATTCC | 3863 |
|           | *****                                                        |      |
| Reference | TGGTTTTGAGGTGCAGGAGACATCAAGGATCCTGGATGAGTCTGAGGACACAGACCTGCC | 4200 |
| Sequenced | TGGTTTTGAGGTGCAGGAGACATCAAGGATCCTGGATGAGTCTGAGGACACAGACCTGCC | 3923 |
|           | *****                                                        |      |
| Reference | CTACCACCACCCAGAGGGAGGCCAACATCTACATGGTTCCCTCAGAACATCAAGCCAGC  | 4260 |
| Sequenced | CTACCACCACCCAGAGGGAGGCCAACATCTACATGGTTCCCTCAGAACATCAAGCCAGC  | 3983 |
|           | *****                                                        |      |
| Reference | GCTCCAGCGTACCGCCATCGAGATCCTGGCATGGGGCCTGCGGAACATGAAGAGTTACCA | 4320 |
| Sequenced | GCTCCAGCGTACCGCCATCGAGATCCTGGCATGGGGCCTGCGGAACATGAAGAGTTACCA | 4043 |
|           | *****                                                        |      |
| Reference | GCTGGCCAACATCTCTCCCCAGCCTCGTGGTAGAGTGTGGGGCCAGACGGTGCAGTC    | 4380 |
| Sequenced | GCTGGCCAACATCTCTCCCCAGCCTCGTGGTAGAGTGTGGGGCCAGACGGTGCAGTC    | 4103 |
|           | *****                                                        |      |
| Reference | CTGTGTCATCAGGAACCTCCGGAAGAACCCTTACATCTGCACCCCTTTCATGGA       | 4440 |
| Sequenced | CTGTGTCATCAGGAACCTCCGGAAGAACCCTTACATCTGCACCCCTTTCATGGA       | 4163 |
|           | *****                                                        |      |
| Reference | AGTGATGCTGCCAGGGAGGAGCTCTACTGCCCCCATCACCGTCAAGGTCATCGATAA    | 4500 |
| Sequenced | AGTGATGCTGCCAGGGAGGAGCTCTACTGCCCCCATCACCGTCAAGGTCATCGATAA    | 4223 |
|           | *****                                                        |      |
| Reference | CCGCCAGTTTGGCCGCGGCTGTGGTGGGCCAGTGTACCATCCGCTCCCTGGAGAGCTT   | 4560 |
| Sequenced | CCGCCAGTTTGGCCGCGGCTGTGGTGGGCCAGTGTACCATCCGCTCCCTGGAGAGCTT   | 4283 |
|           | *****                                                        |      |
| Reference | CCTGTGTACCCCTACTCGGCGGAGAGTCCATCCCCACAGGGTGGCCAGACGATGTGAG   | 4620 |
| Sequenced | CCTGTGTACCCCTACTCGGCGGAGAGTCCATCCCCACAGGGTGGCCAGACGATGTGAG   | 4343 |
|           | *****                                                        |      |
| Reference | CCTACTCAGTCTGGGGAAGACGTGCTCATCGACATTGATGACAAGGAGCCCTCATCCC   | 4680 |
| Sequenced | CCTACTCAGTCTGGGGAAGACGTGCTCATCGACATTGATGACAAGGAGCCCTCATCCC   | 4403 |
|           | *****                                                        |      |
| Reference | CATCCAGGAGGAAGAGTTCATCGATTGGTGGAGCAAATCTTTGCCTCCATAGGGGAGAG  | 4740 |
| Sequenced | CATCCAGGAGGAAGAGTTCATCGATTGGTGGAGCAAATCTTTGCCTCCATAGGGGAGAG  | 4463 |
|           | *****                                                        |      |
| Reference | GGAAAAGTGGGCTCCTACTGGAGAAGGATTTGACACCCTGAAGGTCTATGACACACA    | 4800 |
| Sequenced | GGAAAAGTGGGCTCCTACTGGAGAAGGATTTGACACCCTGAAGGTCTATGACACACA    | 4523 |
|           | *****                                                        |      |

|           |                                                               |      |
|-----------|---------------------------------------------------------------|------|
| Reference | GCTGGAGAATGTGGAGGCCTTTGAGGGCCTGTCTGACTTTTGTAAACACCTTCAAGCTGTA | 4860 |
| Sequenced | GCTGGAGAATGTGGAGGCCTTTGAGGGCCTGTCTGACTTTTGTAAACACCTTCAAGCTGTA | 4583 |
|           | *****                                                         |      |
| Reference | CCGGGGCAAGACGCAGGAGGAGACAGAAGATCCATCTGTGATTGGTGAATTTAAGGCCT   | 4920 |
| Sequenced | CCGGGGCAAGACGCAGGAGGAGACAGAAGATCCATCTGTGATTGGTGAATTTAAGGCCT   | 4643 |
|           | *****                                                         |      |
| Reference | CTTCAAAATTTATCCCTCCAGAAGACCCAGCCATCCCATGCCCCCAAGACAGTTCCA     | 4980 |
| Sequenced | CTTCAAAATTTATCCCTCCAGAAGACCCAGCCATCCCATGCCCCCAAGACAGTTCCA     | 4703 |
|           | *****                                                         |      |
| Reference | CCAGCTGGCCGCCAGGGACCCAGGAGTGCTTGGTCCGTATCTACATTGTCGAGCATT     | 5040 |
| Sequenced | CCAGCTGGCCGCCAGGGACCCAGGAGTGCTTGGTCCGTATCTACATTGTCGAGCATT     | 4763 |
|           | *****                                                         |      |
| Reference | TGGCTGCAGCCCAAGGACCCCAATGGAAGTGTGATCCTTACATCAAGATCTCCATAGG    | 5100 |
| Sequenced | TGGCTGCAGCCCAAGGACCCCAATGGAAGTGTGATCCTTACATCAAGATCTCCATAGG    | 4823 |
|           | *****                                                         |      |
| Reference | GAAGAAATCAGTGAGTGACCAGGATAACTACATCCCTGCACGCTGGAGCCCGTATTTGG   | 5160 |
| Sequenced | GAAGAAATCAGTGAGTGACCAGGATAACTACATCCCTGCACGCTGGAGCCCGTATTTGG   | 4883 |
|           | *****                                                         |      |
| Reference | AAAGATGTTTCGAGCTGACCTGCACTCTGCCTCTGGAGAAGGACCTAAAGATCACTCTTA  | 5220 |
| Sequenced | AAAGATGTTTCGAGCTGACCTGCACTCTGCCTCTGGAGAAGGACCTAAAGATCACTCTTA  | 4943 |
|           | *****                                                         |      |
| Reference | TGACTATGACCTCCTCTCCAAGGACGAAAAGATCGGTGAGACGGTCTGACCTGGAGAA    | 5280 |
| Sequenced | TGACTATGACCTCCTCTCCAAGGACGAAAAGATCGGTGAGACGGTCTGACCTGGAGAA    | 5003 |
|           | *****                                                         |      |
| Reference | CAGGCTGTCTCCAAGTTTGGGGCTCGCTGTGGACTCCACAGACCTACTGTGTCTCTGG    | 5340 |
| Sequenced | CAGGCTGTCTCCAAGTTTGGGGCTCGCTGTGGACTCCACAGACCTACTGTGTCTCTGG    | 5063 |
|           | *****                                                         |      |
| Reference | ACCGAACCAAGTGGCGGGACCAGCTCCGCCCTCCAGCTCCTCCACCTCTTCTGCCAGCA   | 5400 |
| Sequenced | ACCGAACCAAGTGGCGGGACCAGCTCCGCCCTCCAGCTCCTCCACCTCTTCTGCCAGCA   | 5123 |
|           | *****                                                         |      |
| Reference | GCATAGAGTCAAGGCACCTGTGTACCGGACAGACCGTGAATGTTTCAGGATAAAGAATA   | 5460 |
| Sequenced | GCATAGAGTCAAGGCACCTGTGTACCGGACAGACCGTGAATGTTTCAGGATAAAGAATA   | 5183 |
|           | *****                                                         |      |
| Reference | TTCCATTGAAGAGATAGAGGCTGGCAGGATCCCAAACCCACACCTGGGCCAGTGGAGGA   | 5520 |
| Sequenced | TTCCATTGAAGAGATAGAGGCTGGCAGGATCCCAAACCCACACCTGGGCCAGTGGAGGA   | 5243 |
|           | *****                                                         |      |
| Reference | GCGTCTGGCTCTGCATGTGCTTACGACGAGGGCCTGGTCCCGGAGCACGTGGAGTCACG   | 5580 |
| Sequenced | GCGTCTGGCTCTGCATGTGCTTACGACGAGGGCCTGGTCCCGGAGCACGTGGAGTCACG   | 5303 |
|           | *****                                                         |      |
| Reference | GCCCCCTACAGCCCTGCAGCCAGACATCGAGCAGGGGAAGCTGCAGATGTGGGTCTGA    | 5640 |
| Sequenced | GCCCCCTACAGCCCTGCAGCCAGACATCGAGCAGGGGAAGCTGCAGATGTGGGTCTGA    | 5363 |
|           | *****                                                         |      |
| Reference | CCTATTTCCGAAGGCCTGGGGCGGCTGGACCTCCCTTCAACATCACCCACGGAGAGC     | 5700 |
| Sequenced | CCTATTTCCGAAGGCCTGGGGCGGCTGGACCTCCCTTCAACATCACCCACGGAGAGC     | 5423 |
|           | *****                                                         |      |
| Reference | CAGAAGTTTTCTCGCTGTATTATCTGGAATACCAGAGATGTGATCCTGGATGACCT      | 5760 |
| Sequenced | CAGAAGTTTTCTCGCTGTATTATCTGGAATACCAGAGATGTGATCCTGGATGACCT      | 5483 |
|           | *****                                                         |      |
| Reference | GAGCCTCACGGGGAGAAGATGAGCGACATTTATGTGAAAGTTGGATGATTGGCTTTGA    | 5820 |
| Sequenced | GAGCCTCACGGGGAGAAGATGAGCGACATTTATGTGAAAGTTGGATGATTGGCTTTGA    | 5543 |
|           | *****                                                         |      |
| Reference | AGAACACAAGCAAAGACAGACGTGCATTATCGTTCCCTGGGAGGTGAAGGCAACTCAA    | 5880 |
| Sequenced | AGAACACAAGCAAAGACAGACGTGCATTATCGTTCCCTGGGAGGTGAAGGCAACTCAA    | 5603 |
|           | *****                                                         |      |
| Reference | CTGGAGGTTTCATTTCCCTTCGACTACCTGCCAGCTGAGCAAGTCTGTACCATTGCCAA   | 5940 |
| Sequenced | CTGGAGGTTTCATTTCCCTTCGACTACCTGCCAGCTGAGCAAGTCTGTACCATTGCCAA   | 5663 |
|           | *****                                                         |      |
| Reference | GAAGGATGCCTTCTGGAGGCTGGACAAGACTGAGAGCAAAATCCCAGCACGAGTGGTGT   | 6000 |
| Sequenced | GAAGGATGCCTTCTGGAGGCTGGACAAGACTGAGAGCAAAATCCCAGCACGAGTGGTGT   | 5723 |
|           | *****                                                         |      |
| Reference | CCAGATCTGGGCAATGACAAGTTCTCCTTTGATGATTTCTGGGCTCCCTGCAGCTCGA    | 6060 |

Sequenced CCAGATCTGGACAATGACAAGTTCTCCTTTGATGATTTTCTGGGCTCCCTGCAGCTCGA 5783  
\*\*\*\*\*

Reference TCTCAACCGCATGCCAAGCCAGCCAAGACAGCCAAGAAGTGCTCCTTGGACCAGCTGGA 6120  
Sequenced TCTCAACCGCATGCCAAGCCAGCCAAGACAGCCAAGAAGTGCTCCTTGGACCAGCTGGA 5843  
\*\*\*\*\*

Reference TGATGCTTTCACCCAGAATGGTTTGTGTCCCTTTTGTGAGCAGAAAACAGTGAAGGGCTG 6180  
Sequenced TGATGCTTTCACCCAGAATGGTTTGTGTCCCTTTTGTGAGCAGAAAACAGTGAAGGGCTG 5903  
\*\*\*\*\*

Reference GTGGCCCTGTGTAGCAGAAGAGGGTGAAGAAAAATACTGGCGGGCAAGCTGGAAATGAC 6240  
Sequenced GTGGCCCTGTGTAGCAGAAGAGGGTGAAGAAAAATACTGGCGGGCAAGCTGGAAATGAC 5963  
\*\*\*\*\*

Reference CTTGGAGATTGTAGCAGAGAGTGAGCATGAGGAGCGGCCTGTGGCCAGGGCCGGGATGA 6300  
Sequenced CTTGGAGATTGTAGCAGAGAGTGAGCATGAGGAGCGGCCTGTGGCCAGGGCCGGGATGA 6023  
\*\*\*\*\*

Reference GCCAACATGAACCCTAAGCTTGAGGACCCAAGGCGCCCGACACCTCCTTCTGTGGTT 6360  
Sequenced GCCAACATGAACCCTAAGCTTGAGGACCCAAGGCGCCCGACACCTCCTTCTGTGGTT 6083  
\*\*\*\*\*

Reference TACCTCCCATAACAAGACCATGAAGTTCATCCTGTGGCGGCGTTTCCGGTGGGCCATCAT 6420  
Sequenced TACCTCCCATAACAAGACCATGAAGTTCATCCTGTGGCGGCGTTTCCGGTGGGCCATCAT 6143  
\*\*\*\*\*

Reference CCTTTCATCATCCTTTCATCCTGTGCTGTTCCTGGCCATCTTCATCTACGCCTTCCC 6480  
Sequenced CCTTTCATCATCCTTTCATCCTGTGCTGTTCCTGGCCATCTTCATCTACGCCTTCCC 6203  
\*\*\*\*\*

Reference GAACTATGCTGCCATGAAGCTGGTGAAGCCCTTCAGCTGAGGACTCTCCTGCCCTGTAGA 6540  
Sequenced GAACTATGCTGCCATGAAGCTGGTGAAGCCCTTCAGCTGA----- 6243  
\*\*\*\*\*

Reference AGGGCCGTTGGGTTCCCTCCAGCATGGGACTGGCCTGCCTCCTCCGCCAGCTCGGCGA 6600  
Sequenced -----

Reference GCTCCTCCAGACCTCCTAGGCCTGATTGTCTGCCAGGGTGGGCAGACAGACAGATGGAC 6660  
Sequenced -----

Reference CGGCCCACTCCAGAGTTGCTAACATGGAGCTCTGAGATCACCCACTTCCATCATT 6720  
Sequenced -----

Reference CCTTCTCCCCAACCCAACGCTTTTTTGGATCAGCTCAGACATATTTAGTATAAAACAG 6780  
Sequenced -----

Reference TTGGAACCACACAGCA 6796  
Sequenced -----
